# Supplementary material for: Subventricular zone/white matter microglia reconstitute the empty adult microglial niche in a dynamic wave
Source: eLife. 2021 Aug 23;10:e66738. doi: 10.7554/eLife.66738 (PMC8425950; doi:10.7554/eLife.66738)
Supplement: Figure 1—source data 1. [file elife-66738-fig1-data1.xlsx]

## Sheet: Figure 1E
Source data for Figure 1E
Animal/sample	Treatment group	No. of IBA1+ cells/FOV in SSCTX
Con1	Control	120
Con2	Control	170
Con3	Control	124
Con4	Control	153
0d1	7d PLX3397 600 ppm	2
0d2	7d PLX3397 600 ppm	1
0d3	7d PLX3397 600 ppm	2
0d4	7d PLX3397 600 ppm	1
1d1	7d PLX3397 600 ppm + 1d Recovery	2
1d2	7d PLX3397 600 ppm + 1d Recovery	4
1d3	7d PLX3397 600 ppm + 1d Recovery	1
1d4	7d PLX3397 600 ppm + 1d Recovery	8
2d1	7d PLX3397 600 ppm + 2d Recovery	21
2d2	7d PLX3397 600 ppm + 2d Recovery	10
2d3	7d PLX3397 600 ppm + 2d Recovery	13
2d4	7d PLX3397 600 ppm + 2d Recovery	7
3d1	7d PLX3397 600 ppm + 3d Recovery	24
3d2	7d PLX3397 600 ppm + 3d Recovery	24
3d3	7d PLX3397 600 ppm + 3d Recovery	27
3d4	7d PLX3397 600 ppm + 3d Recovery	15
7d1	7d PLX3397 600 ppm + 7d Recovery	234
7d2	7d PLX3397 600 ppm + 7d Recovery	157
7d3	7d PLX3397 600 ppm + 7d Recovery	154
7d4	7d PLX3397 600 ppm + 7d Recovery	144

## Sheet: Figure 1F
Source data for Figure 1F
Animal/sample	Treatment group	No. of IBA1+ cells/FOV in SSCTX
Con1	Control	213
Con2	Control	129
Con3	Control	232
0d1	14d PLX3397 600 ppm	0
0d2	14d PLX3397 600 ppm	0
0d3	14d PLX3397 600 ppm	0
0d4	14d PLX3397 600 ppm	0
3d1	14d PLX3397 600 ppm + 3d Recovery	0
3d2	14d PLX3397 600 ppm + 3d Recovery	0
3d3	14d PLX3397 600 ppm + 3d Recovery	0
3d4	14d PLX3397 600 ppm + 3d Recovery	0
7d1	14d PLX3397 600 ppm + 7d Recovery	0
7d2	14d PLX3397 600 ppm + 7d Recovery	0
7d3	14d PLX3397 600 ppm + 7d Recovery	0
7d4	14d PLX3397 600 ppm + 7d Recovery	0
14d1	14d PLX3397 600 ppm + 14d Recovery	93
14d2	14d PLX3397 600 ppm + 14d Recovery	134
14d3	14d PLX3397 600 ppm + 14d Recovery	86
14d4	14d PLX3397 600 ppm + 14d Recovery	6
28d1	14d PLX3397 600 ppm + 28d Recovery	68
28d2	14d PLX3397 600 ppm + 28d Recovery	81
28d3	14d PLX3397 600 ppm + 28d Recovery	79
28d4	14d PLX3397 600 ppm + 28d Recovery	115

## Sheet: Figure 1G
Source data for Figure 1G
Animal/sample	Treatment group	No. of IBA1+ cells/FOV in WM
Con1	Control	394
Con2	Control	372
Con3	Control	206
0d1	14d PLX3397 600 ppm	2
0d2	14d PLX3397 600 ppm	3
0d3	14d PLX3397 600 ppm	0
0d4	14d PLX3397 600 ppm	4
3d1	14d PLX3397 600 ppm + 3d Recovery	0
3d2	14d PLX3397 600 ppm + 3d Recovery	0
3d3	14d PLX3397 600 ppm + 3d Recovery	1
7d1	14d PLX3397 600 ppm + 7d Recovery	63
7d2	14d PLX3397 600 ppm + 7d Recovery	45
7d3	14d PLX3397 600 ppm + 7d Recovery	29
7d4	14d PLX3397 600 ppm + 7d Recovery	81
14d1	14d PLX3397 600 ppm + 14d Recovery	277
14d2	14d PLX3397 600 ppm + 14d Recovery	242
14d3	14d PLX3397 600 ppm + 14d Recovery	207
14d4	14d PLX3397 600 ppm + 14d Recovery	241
28d1	14d PLX3397 600 ppm + 28d Recovery	250
28d2	14d PLX3397 600 ppm + 28d Recovery	245
28d3	14d PLX3397 600 ppm + 28d Recovery	253
28d4	14d PLX3397 600 ppm + 28d Recovery	262

## Sheet: Figure 1H
Source data for Figure 1H
Animal/sample	Treatment group	PLX3397 (µM) in Plasma	PLX3397 (µM) in Brain
7d1	7d PLX3397 600 ppm	190.488	11.8162
7d2	7d PLX3397 600 ppm	227.805	15.0646
7d3	7d PLX3397 600 ppm	243.902	11.7726
7d4	7d PLX3397 600 ppm	227.073	11.6055
14d1	14d PLX3397 600 ppm	329.268	13.9247
14d2	14d PLX3397 600 ppm	309.756	11
14d3	14d PLX3397 600 ppm	190.244	17.4995
14d4	14d PLX3397 600 ppm	309.756	21.2176

## Sheet: Figure 1J
Source data for Figure 1J
Animal/sample	Treatment group	IBA1+ cell body area (µm2)
Con1	Control	658.37
Con2	Control	531.54
Con3	Control	815.87
7d1	14d PLX3397 600 ppm + 7d Recovery	2461.67
7d2	14d PLX3397 600 ppm + 7d Recovery	2613.77
7d3	14d PLX3397 600 ppm + 7d Recovery	1633.78
7d4	14d PLX3397 600 ppm + 7d Recovery	1090.63
14d1	14d PLX3397 600 ppm + 14d Recovery	971.55
14d2	14d PLX3397 600 ppm + 14d Recovery	967.08
14d3	14d PLX3397 600 ppm + 14d Recovery	957.78
14d4	14d PLX3397 600 ppm + 14d Recovery	877.8
28d1	14d PLX3397 600 ppm + 28d Recovery	1177.6
28d2	14d PLX3397 600 ppm + 28d Recovery	758.04
28d3	14d PLX3397 600 ppm + 28d Recovery	572.65
28d4	14d PLX3397 600 ppm + 28d Recovery	658.13

## Sheet: Figure 1K
Source data for Figure 1K
Animal/sample	Treatment group	Process length/ IBA1+ cells
Con1	Control	431.281
Con2	Control	390.53
Con3	Control	353.273
Con4	Control	321.455
Con5	Control	399.454
Con6	Control	393.742
7d1	14d PLX3397 600 ppm + 7d Recovery	2.3234
7d2	14d PLX3397 600 ppm + 7d Recovery	4.52096
7d3	14d PLX3397 600 ppm + 7d Recovery	0
7d4	14d PLX3397 600 ppm + 7d Recovery	2.41953
14d1	14d PLX3397 600 ppm + 14d Recovery	45.3638
14d2	14d PLX3397 600 ppm + 14d Recovery	59.3305
14d3	14d PLX3397 600 ppm + 14d Recovery	83.8611
14d4	14d PLX3397 600 ppm + 14d Recovery	104.247
28d1	14d PLX3397 600 ppm + 28d Recovery	290.546
28d2	14d PLX3397 600 ppm + 28d Recovery	244.972
28d3	14d PLX3397 600 ppm + 28d Recovery	131.247
28d4	14d PLX3397 600 ppm + 28d Recovery	250.82
28d4	14d PLX3397 600 ppm + 28d Recovery	204.04

## Sheet: Figure 1L
Source data for Figure 1L
		IBA1+ process complexity/branching
Animal/sample	Treatment group	Level 1	Level 2	Level 3+
Con1	Control	9.6216	13.3874	23.2342
Con2	Control	8.8347	12.6446	24.562
Con3	Control	7.0077	9.8	18.2077
Con4	Control	4.9051	7.29927	18.2044
Con5	Control	5.713	9.44444	20.4537
Con6	Control	7.9831	11.0424	19.7627
7d1	14d PLX3397 600 ppm + 7d Recovery	0.3462	0.15385	0
7d2	14d PLX3397 600 ppm + 7d Recovery	0.0882	0	0
7d3	14d PLX3397 600 ppm + 7d Recovery	0	0	0
7d4	14d PLX3397 600 ppm + 7d Recovery	0.0656	0	0
14d1	14d PLX3397 600 ppm + 14d Recovery	1.8408	1.0898	0.391837
14d2	14d PLX3397 600 ppm + 14d Recovery	2.5597	1.82594	0.948805
14d3	14d PLX3397 600 ppm + 14d Recovery	3.6078	2.4951	1.26961
14d4	14d PLX3397 600 ppm + 14d Recovery	3.9486	3.10286	1.85714
28d1	14d PLX3397 600 ppm + 28d Recovery	6.1944	8.02778	11.7037
28d2	14d PLX3397 600 ppm + 28d Recovery	3.9783	4.84783	7.70652
28d3	14d PLX3397 600 ppm + 28d Recovery	3.1503	3.47668	4.46632
28d4	14d PLX3397 600 ppm + 28d Recovery	6.1164	6.80137	8.45205
28d4	14d PLX3397 600 ppm + 28d Recovery	5.0179	5.74405	7.38095
