# Supplementary material for: Subventricular zone/white matter microglia reconstitute the empty adult microglial niche in a dynamic wave
Source: eLife. 2021 Aug 23;10:e66738. doi: 10.7554/eLife.66738 (PMC8425950; doi:10.7554/eLife.66738)
Supplement: Figure 2—source data 1. [file elife-66738-fig2-data1.xlsx]

## Sheet: Figure 2D
Source data for Figure 2D
Animal/sample	No. of IBA1+ cells
Stage1-1	154
Stage1-2	89
Stage1-3	150
Stage2-1	323
Stage2-2	715
Stage2-3	185
Stage3-1	898
Stage3-2	1032
Stage3-3	742
Stage3-4	1943
Stage3-5	1320
Stage3-6	1311
Stage3-7	3081
Stage3-8	2952
Stage4-1	5068
Stage4-2	5309
Stage4-3	5031
Stage4-4	4765
Stage4-5	5441
Stage4-6	6101
Stage4-7	5821
Stage4-8	6144
