# Supplementary material for: Subventricular zone/white matter microglia reconstitute the empty adult microglial niche in a dynamic wave
Source: eLife. 2021 Aug 23;10:e66738. doi: 10.7554/eLife.66738 (PMC8425950; doi:10.7554/eLife.66738)
Supplement: Figure 3—source data 1. [file elife-66738-fig3-data1.xlsx]

## Sheet: Figure 3I
Source data for Figure 3I
Animal/sample	Treatment group	% Colocalization of CD11b/P2RY12
Con1	Control	25.79
Con2	Control	41.78
Con3	Control	30.64
Con4	Control	32.73
7d1	14d PLX3397 600 ppm + 7d recovery	0.04
7d2	14d PLX3397 600 ppm + 7d recovery	0.4
7d3	14d PLX3397 600 ppm + 7d recovery	0.25
7d4	14d PLX3397 600 ppm + 7d recovery	0.1
14d1	14d PLX3397 600 ppm + 14d recovery	5.9
14d2	14d PLX3397 600 ppm + 14d recovery	0.82
14d3	14d PLX3397 600 ppm + 14d recovery	4.42
14d4	14d PLX3397 600 ppm + 14d recovery	5.58
28d1	14d PLX3397 600 ppm + 28d recovery	26.69
28d2	14d PLX3397 600 ppm + 28d recovery	25.05
28d3	14d PLX3397 600 ppm + 28d recovery	45.57
28d4	14d PLX3397 600 ppm + 28d recovery	8.89

## Sheet: Figure Supplement 2D
Source data for Figure supplement 2D
Animal/sample	Treatment group	No. of IBA1+ cells/mm2
Con1	Control	253
Con2	Control	226
Con3	Control	271
Con4	Control	230
Con5	Control	293
0d1	14d PLX3397 600 ppm	0
0d2	14d PLX3397 600 ppm	0
0d3	14d PLX3397 600 ppm	0
0d4	14d PLX3397 600 ppm	1
0d5	14d PLX3397 600 ppm	0

## Sheet: Figure Supplement 2H
Source data for Figure supplement 2H
Animal/sample	Treatment group	No. of IBA1+ cells/whole brain slice
Con1	Control	6169
Con2	Control	5058
Con3	Control	6354
Con4	Control	7361
Con5	Control	7193
3mo1	3.5 mo PLX3397 600 ppm	1
3mo2	3.5 mo PLX3397 600 ppm	3
3mo3	3.5 mo PLX3397 600 ppm	5
3mo4	3.5 mo PLX3397 600 ppm	0
