# Supplementary material for: Subventricular zone/white matter microglia reconstitute the empty adult microglial niche in a dynamic wave
Source: eLife. 2021 Aug 23;10:e66738. doi: 10.7554/eLife.66738 (PMC8425950; doi:10.7554/eLife.66738)
Supplement: Figure 4—source data 1. [file elife-66738-fig4-data1.xlsx]

## Sheet: Figure 4A
Source data for Figure 4A
Animal/sample	Genotype group	Treatment group	No. of IBA1+ cells/ROI in subiculum (SUB)	No. of IBA1+ cells/ROI in cortex (CTX)
WT1	Wildtype	Control	128	116
WT2	Wildtype	Control	144	112
WT3	Wildtype	Control	151	115
WT4	Wildtype	Control	103	133
WT5	Wildtype	Control	164	92
WT6	Wildtype	Control	194	128
WT7	Wildtype	Control	na	89
WT8	Wildtype	Control	na	143
BCL2-1	H2K-BCL2	Control	296	182
BCL2-2	H2K-BCL2	Control	305	185
BCL2-3	H2K-BCL2	Control	158	118
BCL2-4	H2K-BCL2	Control	145	121
BCL2-5	H2K-BCL2	Control	198	92
BCL2-6	H2K-BCL2	Control	253	117
BCL2-7	H2K-BCL2	Control	249	155

## Sheet: Figure 4C
Source data for Figure 4C
Animal/sample	Treatment group	No. of IBA1+ cells/brain slice
Con1	Control	8062
Con2	Control	9544
Con3	Control	9070
Con4	Control	9174
Con5	Control	8964
Con6	Control	7260
0d1	14d PLX3397 600 ppm	719
0d2	14d PLX3397 600 ppm	3370
0d3	14d PLX3397 600 ppm	379
0d4	14d PLX3397 600 ppm	1196
7d1	14d PLX3397 600 ppm + 7d recovery	14470
7d2	14d PLX3397 600 ppm + 7d recovery	14617
7d3	14d PLX3397 600 ppm + 7d recovery	11074
7d4	14d PLX3397 600 ppm + 7d recovery	13926
7d5	14d PLX3397 600 ppm + 7d recovery	11430
