# Supplementary material for: Subventricular zone/white matter microglia reconstitute the empty adult microglial niche in a dynamic wave
Source: eLife. 2021 Aug 23;10:e66738. doi: 10.7554/eLife.66738 (PMC8425950; doi:10.7554/eLife.66738)
Supplement: Figure 5—source data 1. [file elife-66738-fig5-data1.xlsx]

## Sheet: Figure Supplement 3F
Source data for Figure supplement 3F
Animal/sample	Treatment group	% NESTIN+IBA1+ cells/FOV
Con1	Control	1
Con2	Control	0
Con3	Control	0
Con4	Control	14.29
Con5	Control	0
Con6	Control	0
Con7	Control	0
Con8	Control	0
Con9	Control	0
Con10	Control	0
0d1	14d PLX3397 600 ppm	0
0d2	14d PLX3397 600 ppm	0
0d3	14d PLX3397 600 ppm	100
0d4	14d PLX3397 600 ppm	33
0d5	14d PLX3397 600 ppm	0
0d6	14d PLX3397 600 ppm	100
0d7	14d PLX3397 600 ppm	100
0d8	14d PLX3397 600 ppm	100
3d1	14d PLX3397 600 ppm + 3d recovery	50
3d2	14d PLX3397 600 ppm + 3d recovery	83
3d3	14d PLX3397 600 ppm + 3d recovery	100
3d4	14d PLX3397 600 ppm + 3d recovery	100
5d1	14d PLX3397 600 ppm + 5d recovery	91
5d2	14d PLX3397 600 ppm + 5d recovery	100
5d3	14d PLX3397 600 ppm + 5d recovery	81
5d4	14d PLX3397 600 ppm + 5d recovery	75
5d5	14d PLX3397 600 ppm + 5d recovery	100
5d6	14d PLX3397 600 ppm + 5d recovery	90
5d7	14d PLX3397 600 ppm + 5d recovery	100
5d8	14d PLX3397 600 ppm + 5d recovery	60
5d9	14d PLX3397 600 ppm + 5d recovery	100
5d10	14d PLX3397 600 ppm + 5d recovery	100
5d11	14d PLX3397 600 ppm + 5d recovery	100
5d12	14d PLX3397 600 ppm + 5d recovery	100
7d1	14d PLX3397 600 ppm + 7d recovery	36
7d2	14d PLX3397 600 ppm + 7d recovery	66
7d3	14d PLX3397 600 ppm + 7d recovery	73
7d4	14d PLX3397 600 ppm + 7d recovery	75

## Sheet: Figure Supplement 3G 
Source data for Figure supplement 3G
Animal/sample	Treatment group	% MASH1+IBA1+ cells/FOV
Con1	Control	8.333
Con2	Control	7.692
Con3	Control	0
Con4	Control	14.29
Con5	Control	0
0d1	14d PLX3397 600 ppm	100
0d2	14d PLX3397 600 ppm	100
0d3	14d PLX3397 600 ppm	100
3d1	14d PLX3397 600 ppm + 3d recovery	100
3d2	14d PLX3397 600 ppm + 3d recovery	100
3d3	14d PLX3397 600 ppm + 3d recovery	100
5d1	14d PLX3397 600 ppm + 5d recovery	60
5d2	14d PLX3397 600 ppm + 5d recovery	66.67
5d3	14d PLX3397 600 ppm + 5d recovery	76.92
5d4	14d PLX3397 600 ppm + 5d recovery	100
5d5	14d PLX3397 600 ppm + 5d recovery	100
7d1	14d PLX3397 600 ppm + 7d recovery	40
7d2	14d PLX3397 600 ppm + 7d recovery	50
7d3	14d PLX3397 600 ppm + 7d recovery	35.71
7d4	14d PLX3397 600 ppm + 7d recovery	40

## Sheet: Figure Supplement 3H 
Source data for Figure supplement 3H
Animal/sample	Treatment group	% TIE2+IBA1+ cells/FOV
Con1	Control	0
Con2	Control	5.55556
Con3	Control	11.1111
Con4	Control	33.3333
Con5	Control	0
0d1	14d PLX3397 600 ppm	100
0d2	14d PLX3397 600 ppm	100
3d1	14d PLX3397 600 ppm + 3d recovery	100
3d2	14d PLX3397 600 ppm + 3d recovery	50
3d3	14d PLX3397 600 ppm + 3d recovery	75
3d4	14d PLX3397 600 ppm + 3d recovery	50
5d1	14d PLX3397 600 ppm + 5d recovery	0
5d2	14d PLX3397 600 ppm + 5d recovery	14.2857
5d3	14d PLX3397 600 ppm + 5d recovery	33.3333
5d4	14d PLX3397 600 ppm + 5d recovery	100
5d5	14d PLX3397 600 ppm + 5d recovery	100
7d1	14d PLX3397 600 ppm + 7d recovery	50
7d2	14d PLX3397 600 ppm + 7d recovery	33.3333

## Sheet: Figure Supplement 4B
Source data for Figure supplement 4B
Animal/sample	Genotype group	Treatment group	% YFP+IBA1+ cells
Con1	Cx3cr1-CreERT2/YFP	Tamoxifen + Control	93.1372
Con2	Cx3cr1-CreERT2/YFP	Tamoxifen + Control	92.7185
Con3	Cx3cr1-CreERT2/YFP	Tamoxifen + Control	96.0699
Con4	Cx3cr1-CreERT2/YFP	Tamoxifen + Control	95.2607
0d1	Cx3cr1-CreERT2/YFP	Tamoxifen + 14d PLX3397 600 ppm	100
0d2	Cx3cr1-CreERT2/YFP	Tamoxifen + 14d PLX3397 600 ppm	100
0d3	Cx3cr1-CreERT2/YFP	Tamoxifen + 14d PLX3397 600 ppm	100
7d1	Cx3cr1-CreERT2/YFP	Tamoxifen + 14d PLX3397 600 ppm + 7d recovery	98.5876
7d2	Cx3cr1-CreERT2/YFP	Tamoxifen + 14d PLX3397 600 ppm + 7d recovery	87.8049
7d3	Cx3cr1-CreERT2/YFP	Tamoxifen + 14d PLX3397 600 ppm + 7d recovery	96.3173
7d4	Cx3cr1-CreERT2/YFP	Tamoxifen + 14d PLX3397 600 ppm + 7d recovery	99.0132
7d5	Cx3cr1-CreERT2/YFP	Tamoxifen + 14d PLX3397 600 ppm + 7d recovery	94.2029
7d6	Cx3cr1-CreERT2/YFP	Tamoxifen + 14d PLX3397 600 ppm + 7d recovery	94.5763
ConNT1	Cx3cr1-CreERT2/YFP	Control	6.32411
ConNT2	Cx3cr1-CreERT2/YFP	Control	3.42679
ConNT3	Cx3cr1-CreERT2/YFP	Control	4.20168
ConNT4	Cx3cr1-CreERT2/YFP	Control	10.7
ConNT5	Cx3cr1-CreERT2/YFP	Control	9.75
ConNT6	Cx3cr1-CreERT2/YFP	Control	3.95
7dNT1	Cx3cr1-CreERT2/YFP	14d PLX3397 600 ppm + 7d recovery	9.45946
7dNT2	Cx3cr1-CreERT2/YFP	14d PLX3397 600 ppm + 7d recovery	8.33333
7dNT3	Cx3cr1-CreERT2/YFP	14d PLX3397 600 ppm + 7d recovery	16.4773
7dNT4	Cx3cr1-CreERT2/YFP	14d PLX3397 600 ppm + 7d recovery	17.3285
