# Supplementary material for: Subventricular zone/white matter microglia reconstitute the empty adult microglial niche in a dynamic wave
Source: eLife. 2021 Aug 23;10:e66738. doi: 10.7554/eLife.66738 (PMC8425950; doi:10.7554/eLife.66738)
Supplement: Figure 6—source data 1. [file elife-66738-fig6-data1.xlsx]

## Sheet: Figure 6G
Source data for Figure 6G
Animal/sample	Treatment group	No. of IBA1+ cells/brain slice
Iso1	14d PLX3397 600 ppm + 7d recovery + Isotype control	885
Iso2	14d PLX3397 600 ppm + 7d recovery + Isotype control	1500
Iso3	14d PLX3397 600 ppm + 7d recovery + Isotype control	1083
Ccl12-1	14d PLX3397 600 ppm + 7d recovery + antiCCL12	324
Ccl12-2	14d PLX3397 600 ppm + 7d recovery + antiCCL12	509
Ccl12-3	14d PLX3397 600 ppm + 7d recovery + antiCCL12	631

## Sheet: Figure 6H
Source data for Figure 6H
Animal/sample	Treatment group	Total distance traveled by wavefront (µm)
Iso1	14d PLX3397 600 ppm + 7d recovery + Isotype control	1013.55
Iso2	14d PLX3397 600 ppm + 7d recovery + Isotype control	933.685
Iso3	14d PLX3397 600 ppm + 7d recovery + Isotype control	1140.39
Ccl12-1	14d PLX3397 600 ppm + 7d recovery + antiCCL12	903.309
Ccl12-2	14d PLX3397 600 ppm + 7d recovery + antiCCL12	844.506
Ccl12-3	14d PLX3397 600 ppm + 7d recovery + antiCCL12	986.19
