# Supplementary material for: Subventricular zone/white matter microglia reconstitute the empty adult microglial niche in a dynamic wave
Source: eLife. 2021 Aug 23;10:e66738. doi: 10.7554/eLife.66738 (PMC8425950; doi:10.7554/eLife.66738)
Supplement: Figure 7—source data 1. [file elife-66738-fig7-data1.xlsx]

## Sheet: Figure 7B
Source data for Figure 7B
Animal/sample	Treatment group	No. of Parenchymal IBA1+ cells	No. of choroid plexus IBA1+ cells
Con1	Control	99	44
Con2	Control	98	17
Con3	Control	73	28
Con4	Control	106	45
Con5	Control	143	39
0d1	14d PLX3397 600 ppm	0	0
0d2	14d PLX3397 600 ppm	0	0
0d3	14d PLX3397 600 ppm	0	0
7d1	14d PLX3397 600 ppm + 7d recovery	89	0
7d2	14d PLX3397 600 ppm + 7d recovery	51	4
7d3	14d PLX3397 600 ppm + 7d recovery	95	0
7d4	14d PLX3397 600 ppm + 7d recovery	47	0
28d1	14d PLX3397 600 ppm + 28d recovery	95	3
28d2	14d PLX3397 600 ppm + 28d recovery	128	21
28d3	14d PLX3397 600 ppm + 28d recovery	116	26
28d4	14d PLX3397 600 ppm + 28d recovery	115	30

## Sheet: Figure 7D
Source data for Figure 7D
Animal/sample	Treatment group	No. of CX3CR1+ cells	No. of CCR2+ cells
Con1	Control	2640	14
Con2	Control	1427	3
Con3	Control	1788	38
0d1	14d PLX3397 600 ppm	2	10
0d2	14d PLX3397 600 ppm	5	27
0d3	14d PLX3397 600 ppm	12	36
7d1	14d PLX3397 600 ppm + 7d recovery	676	2
7d2	14d PLX3397 600 ppm + 7d recovery	118	4
7d3	14d PLX3397 600 ppm + 7d recovery	505	1
7d4	14d PLX3397 600 ppm + 7d recovery	1868	6
7d5	14d PLX3397 600 ppm + 7d recovery	1441	15

## Sheet: Figure 7K
Source data for Figure 7K
Animal/sample	Treatment group	No. of GFP+ cells	No. of IBA1+ cells
Con1	Control	54	3404
Con2	Control	152	2758
Con3	Control	8	2635
0d1	14d PLX3397 600 ppm	9	56
0d2	14d PLX3397 600 ppm	18	51
0d3	14d PLX3397 600 ppm	2	27
0d4	14d PLX3397 600 ppm	61	17
7d1	14d PLX3397 600 ppm + 7d recovery	130	40
7d2	14d PLX3397 600 ppm + 7d recovery	29	1082
7d3	14d PLX3397 600 ppm + 7d recovery	56	1523
14d1	14d PLX3397 600 ppm + 14d recovery	64	5914
14d2	14d PLX3397 600 ppm + 14d recovery	314	6388
14d3	14d PLX3397 600 ppm + 14d recovery	2859	5586
14d4	14d PLX3397 600 ppm + 14d recovery	50	7660

## Sheet: Figure Supplement 5C-E
Source data for Figure supplement 5C-E
Animal/sample	Treatment group	% CD45+ Cd11b+Cd45lo cells (in brain)	% CD45+ CCR2+ cells (in blood)	% CD45+ CX3CR1+ cells (in blood)	% CD45+ Cd11b+CD45hi cells (in spleen)	% CD45+ Cd11b+CD11c+ cells (in spleen)
Con1	Control	36.9	0.87	0.35	6.93	0.34
Con2	Control	60.8	0.41	0.35	3.36	0.53
Con3	Control	46.4	0.71	0.15	1.71	0.56
Con4	Control	64.9	0.43	0.071	1.82	0.5
Con5	Control	91.7
Con6	Control	41.3
0d1	14d PLX3397 600 ppm	0.48	0.14	0.062	3.75	0.17
0d2	14d PLX3397 600 ppm	1.73	0.38	0.15	5	0.35
0d3	14d PLX3397 600 ppm	0.72	0.24	0.039	3.79	0.24
7d1	14d PLX3397 600 ppm + 7d recovery	85.2	0.029	0.17	3.92	0.47
7d2	14d PLX3397 600 ppm + 7d recovery	84.6	0.41	0.063	3.41	0.32
7d3	14d PLX3397 600 ppm + 7d recovery	85.4	0.3	0.058	3.25	0.54

## Sheet: Figure Supplement 5F
Source data for Figure supplement 5F
Animal/sample	Treatment group	% CD45+ HSC	% CD45+ CMP	% CD45+ GMP
Con1	Control	0.04	0.17	0.14
Con2	Control	0.079	0.17	0.12
Con3	Control	0.027	0.14	0.11
Con4	Control	0.024	0.098	0.1
0d1	14d PLX3397 600 ppm	0.072	0.47	0.3
0d2	14d PLX3397 600 ppm	0.078	0.69	0.48
0d3	14d PLX3397 600 ppm	0.085	0.45	0.27
7d1	14d PLX3397 600 ppm + 7d recovery	0.14	0.038	0.6
7d2	14d PLX3397 600 ppm + 7d recovery	0.26	0.075	0.67
7d3	14d PLX3397 600 ppm + 7d recovery	0.15	0.068	0.5

## Sheet: Figure Supplement 5H
Source data for Figure supplement 5F
Animal/sample	Treatment group	No. of IBA1+ cells/FOV (in cortex)	No. of IBA1+ cells/FOV (in WM tracts)
Con1	Control	115	84
Con2	Control	108	87
Con3	Control	121	63
Con4	Control	113
0d1	14d PLX3397 600 ppm	3	4
0d2	14d PLX3397 600 ppm	1	2
0d3	14d PLX3397 600 ppm	5	7
0d4	14d PLX3397 600 ppm	3	13
7d1	14d PLX3397 600 ppm + 7d recovery	99	53
7d2	14d PLX3397 600 ppm + 7d recovery	138	84
7d3	14d PLX3397 600 ppm + 7d recovery	183	65
7d4	14d PLX3397 600 ppm + 7d recovery		109
