# Supplementary material for: Subventricular zone/white matter microglia reconstitute the empty adult microglial niche in a dynamic wave
Source: eLife. 2021 Aug 23;10:e66738. doi: 10.7554/eLife.66738 (PMC8425950; doi:10.7554/eLife.66738)
Supplement: Figure 8—source data 1. [file elife-66738-fig8-data1.xlsx]

## Sheet: Figure supplement 6B
Source data for Figure supplement 6B
		CD45 MFI
Animal/sample	Treatment group	0 hr (no LPS)	6 hr (post LPS)	24 hr (post LPS)
Con1	Control	828	988	1174
Con2	Control	849	1091	1130
Con3	Control	906	972	1091
Con4	Control		1093	1168
Con5	Control		994
28d1	14d PLX3397 600 ppm + 28d recovery	1053	1134	1246
28d2	14d PLX3397 600 ppm + 28d recovery	1099	1202	1150
28d3	14d PLX3397 600 ppm + 28d recovery	1152	1292	1127
28d4	14d PLX3397 600 ppm + 28d recovery	1145	1188	1125

## Sheet: Figure supplement 6C
Source data for Figure supplement 6C
		CD11b MFI
Animal/sample	Treatment group	0 hr (no LPS)	6 hr (post LPS)	24 hr (post LPS)
Con1	Control	6281	6616	7939
Con2	Control	6602	6957	7680
Con3	Control	6718	6588	7003
Con4	Control		7512	7765
Con5	Control		6733
28d1	14d PLX3397 600 ppm + 28d recovery	8953	9115	9577
28d2	14d PLX3397 600 ppm + 28d recovery	9156	9974	8794
28d3	14d PLX3397 600 ppm + 28d recovery	9729	9197	9259
28d4	14d PLX3397 600 ppm + 28d recovery	9406	9014	8430

## Sheet: Figure supplement 6D
Source data for Figure supplement 6D
		FSC-A
Animal/sample	Treatment group	0 hr (no LPS)	6 hr (post LPS)	24 hr (post LPS)
Con1	Control	86848	85120	94272
Con2	Control	84864	85568	92928
Con3	Control	84928	85696	90304
Con4	Control		85632	95360
Con5	Control		85696
28d1	14d PLX3397 600 ppm + 28d recovery	89920	88576	92352
28d2	14d PLX3397 600 ppm + 28d recovery	90368	91072	88896
28d3	14d PLX3397 600 ppm + 28d recovery	91392	92416	89344
28d4	14d PLX3397 600 ppm + 28d recovery	90816	89920	94464

## Sheet: Figure supplement 6E
Source data for Figure supplement 6E
		SSC-A
Animal/sample	Treatment group	0 hr (no LPS)	6 hr (post LPS)	24 hr (post LPS)
Con1	Control	66624	71104	81472
Con2	Control	64896	70656	75392
Con3	Control	68608	73472	75712
Con4	Control		70720	77952
Con5	Control		71360
28d1	14d PLX3397 600 ppm + 28d recovery	49664	53376	56448
28d2	14d PLX3397 600 ppm + 28d recovery	52800	55040	53248
28d3	14d PLX3397 600 ppm + 28d recovery	51840	52544	55040
28d4	14d PLX3397 600 ppm + 28d recovery	52352	54528	55488
