# Supplementary material for: Subventricular zone/white matter microglia reconstitute the empty adult microglial niche in a dynamic wave
Source: eLife. 2021 Aug 23;10:e66738. doi: 10.7554/eLife.66738 (PMC8425950; doi:10.7554/eLife.66738)
Supplement: Figure 9—source data 1. [file elife-66738-fig9-data1.xlsx]

## Sheet: Figure 9A-C
Source data for Figure 9A-C
		Open Field
Animal/sample	Treatment group	Distance Traveled (m)	Speed (m/s)	Time in Center zone (s)	Time in Perimeter zone (s)
Con1	Control	19.788	0.066	106.4	193.6
Con2	Control	15.499	0.052	129.2	170.8
Con3	Control	18.919	0.063	109.3	190.7
Con4	Control	18.021	0.06	84.7	215.2
Con5	Control	14.869	0.05	91	209
Con6	Control	15.879	0.053	95.6	204.4
Con7	Control	11.774	0.039	120.4	179.6
Con8	Control	14.535	0.048	118.7	181.3
Con9	Control	11.845	0.039	104.9	195.1
Con10	Control	18.995	0.063	108.7	191.3
28d1	14d PLX3397 600 ppm + 28d recovery	15.089	0.039	114.3	185.7
28d2	14d PLX3397 600 ppm + 28d recovery	13.175	0.044	45.2	254.8
28d3	14d PLX3397 600 ppm + 28d recovery	11.912	0.04	69.1	230.9
28d4	14d PLX3397 600 ppm + 28d recovery	6.823	0.023	28.2	271.8
28d5	14d PLX3397 600 ppm + 28d recovery	16.014	0.053	62	237.9
28d6	14d PLX3397 600 ppm + 28d recovery	13.654	0.046	94.7	205.3
28d7	14d PLX3397 600 ppm + 28d recovery	12.615	0.042	74.6	225.4
28d8	14d PLX3397 600 ppm + 28d recovery	17.699	0.059	76	224
28d9	14d PLX3397 600 ppm + 28d recovery	9.257	0.031	175	125
28d10	14d PLX3397 600 ppm + 28d recovery	14.301	0.048	91.4	208.6

## Sheet: Figure 9D
Source data for Figure 9D
		Y-maze
Animal/sample	Treatment group	No. of alternations in Y-maze
Con1	Control	68.42
Con2	Control	70.97
Con3	Control	63.64
Con4	Control	51.72
Con5	Control	67.31
Con6	Control	61.76
Con7	Control	73.08
Con8	Control	59.09
Con9	Control	66.67
Con10	Control	65.71
28d1	14d PLX3397 600 ppm + 28d recovery	60.71
28d2	14d PLX3397 600 ppm + 28d recovery	51.35
28d3	14d PLX3397 600 ppm + 28d recovery	57.14
28d4	14d PLX3397 600 ppm + 28d recovery	70.83
28d5	14d PLX3397 600 ppm + 28d recovery	65.71
28d6	14d PLX3397 600 ppm + 28d recovery	61.29
28d7	14d PLX3397 600 ppm + 28d recovery	58.62
28d8	14d PLX3397 600 ppm + 28d recovery	62.5
28d9	14d PLX3397 600 ppm + 28d recovery	80
28d10	14d PLX3397 600 ppm + 28d recovery	64.71

## Sheet: Figure 9E
Source data for Figure 9E
		Elevated Plus Maze
Animal/sample	Treatment group	Time spent in open arms (s)	Time spent in closed arms (s)	Time spent in center (s)
Con1	Control	10.1	216.9	72.9
Con2	Control	33.6	185.5	81
Con3	Control	53.4	125	121.6
Con4	Control	37.4	174.6	88
Con5	Control	43.8	153.2	103
Con6	Control	65.1	119.2	115.7
Con7	Control	57.9	125.2	116.9
Con8	Control	75.5	119.1	105.4
Con9	Control	39.7	143	117.3
Con10	Control	63.7	130.9	105.4
28d1	14d PLX3397 600 ppm + 28d recovery	46.3	166.8	86.9
28d2	14d PLX3397 600 ppm + 28d recovery	65.3	147.6	87.1
28d3	14d PLX3397 600 ppm + 28d recovery	39.2	174.9	85.8
28d4	14d PLX3397 600 ppm + 28d recovery	53.7	122.3	124
28d5	14d PLX3397 600 ppm + 28d recovery	16.7	211.2	72.2
28d6	14d PLX3397 600 ppm + 28d recovery	32.2	215.8	52
28d7	14d PLX3397 600 ppm + 28d recovery	52.4	159.3	88.3
28d8	14d PLX3397 600 ppm + 28d recovery	6.8	238.3	54.9
28d9	14d PLX3397 600 ppm + 28d recovery	51.1	138.4	110.5
28d10	14d PLX3397 600 ppm + 28d recovery	27.6	202.5	70

## Sheet: Figure 9F-H
Source data for Figure 9F-H
		Social Interaction Test	Novel Object	Novel Place
Animal/sample	Treatment group	Discrimination Index	Discrimination Index	Discrimination Index
Con1	Control	50.49	48.0645	75.498
Con2	Control	41.09	76.5947	67.9204
Con3	Control	24.89	83.1976	53.0857
Con4	Control	44.83	86.6738	66.5493
Con5	Control	43.73	53.1746	59.7518
Con6	Control	46	86.5352	51.3158
Con7	Control	33.82	86.6255	52.069
Con8	Control	33.07	59.1584	43.4629
Con9	Control	44.06	74.1685	64.9306
Con10	Control	55.57	56.0355	68.362
28d1	14d PLX3397 600 ppm + 28d recovery	37.62	74.4672	23.5079
28d2	14d PLX3397 600 ppm + 28d recovery	54.91	56.5907	51.0081
28d3	14d PLX3397 600 ppm + 28d recovery	46.9	82.6291	59.292
28d4	14d PLX3397 600 ppm + 28d recovery	39.29	54.8433	56.455
28d5	14d PLX3397 600 ppm + 28d recovery	40.04	37.5237	41.5401
28d6	14d PLX3397 600 ppm + 28d recovery	21.01	62.5911	46.7655
28d7	14d PLX3397 600 ppm + 28d recovery	35.97	95.4739	63.1635
28d8	14d PLX3397 600 ppm + 28d recovery	51.17	42.6773	71.0843
28d9	14d PLX3397 600 ppm + 28d recovery	32.84	98.8938	32.4716
28d10	14d PLX3397 600 ppm + 28d recovery	46.47		29.8851

## Sheet: Figure 9J
Source data for Figure 9J	Source data for Figure 9J
Animal/sample		Percentage of t1 intensity
Con1		Time post laser ablation (min)
Con2	Treatment group	1	5	10	15	20	25	30	35	40	45	50	55	60
Con3	Control	100	110.65	117.504	123.214	128.802	136.084	139.93	145.946	146.881	153.128	155.216	158.367	164.336
Con4	Control	100	101.725	109.723	126.278	141.84	159.007	177.171	188.42	198.372	204.151	216.048	215.314	220.953
28d1	Control	100	113.365	119.466	129.542	148.598	155.973	164.617	172.149	175.756	180.36	182.51	187.415	183.604
28d2	Control	100	86.4638	90.8859	96.9005	103.695	117.002	124.705	134.627	142.037	155.536	164.914	171.74	181.202
28d3	14d PLX3397 600 ppm + 35d recovery	100	105.647	122.192	127.502	138.946	161.916	171.891	169.746	184.035	178.155	187.894	193.417	195.735
28d4	14d PLX3397 600 ppm + 35d recovery	100	94.5561	111.373	124.048	139.161	146.203	154.049	154.315	155.453	155.848	156.732	158.257	162.063
	14d PLX3397 600 ppm + 35d recovery	100	113.87	126.775	143.342	157.709	169.004	178.719	184.036	187.107	187.95	193.269	190.47	192.042
	14d PLX3397 600 ppm + 35d recovery	100	100.964	110.366	132.223	146.938	145.602	151.522	152.883	159.707	164.311	175.258	181.383	182.448

## Sheet: Figure 9L
Source data for Figure 9L
Treatment group	Motility (µm/min)
Control	1.313	0.87	1.45	1.196	1.479	1.16	1.313	1.104	1.104	2.129	1.025	0.739	1.104	0.917	0.739	1.16	0.917	1.494	0.845	1.45	1.313	1.313	1.45	1.025	0.739	1.313	1.313	0.845	2.06	0.615	1.104	0.649	0.845	0.649	0.615	1.479	2.208	0.845	2.111	0.739	0.917	0.82	1.196	1.046	0.649	1.196	1.046	1.025	1.196
Control	0.649	1.297	1.479	0.917	1.64	1.375	1.247	0.58	2.3	1.247	0.739	0.87	0.459	0.87	1.196	1.375	0.739	0.917	0.845	1.45	1.196	3.981	0.87	0.82	1.025	1.653	0.917	0.649	0.845	1.025	0.917	0.917	0.917	1.691	1.561	2.06	0.82	1.025	1.64	1.479	1.653	0.917	0.845	1.104	0.917	0.739	2.699	1.025	1.025
Control	1.025	0.459	0.917	1.025	1.104	1.16	0.917	1.046	1.247	1.196	1.653	0.615	0.845	1.247	0.82	0.739	0.649	1.297	0.82	1.834	1.45	1.025	0.615	1.653	1.104	1.653	0.739	1.691	0.739	0.58	1.046	1.025	1.247	1.493	0.739	1.653	1.196	1.23	0.41	1.247	1.945	2.111	1.247	0.845	0.649	0.739	1.196	1.046	0.41
Control	1.435	1.605	0.459	1.313	1.58	0.615	1.479	2.115	0.739	0.739	1.046	1.025	0.845	1.104	0.87	1.046	0.649	1.857	1.64	2.216	0.739	1.834	1.025	1.025	1.196	1.196	0.917	0.82	0.615	1.653	1.479	0.917	0.917			1.247	1.046	1.025	1.494	1.104	0.82	0.41	1.247	2.019	1.104	0.615	0.845	0.459	1.025
14d PLX3397 600 ppm + 35d recovery	4.1	1.196	1.104	1.561	0.82	1.055	1.297	0.917	1.834	1.45	1.23	1.025	0.87	1.196	0.87	0.845	1.025	1.23	0.917	1.375	1.247	1.104	1.025	1.104	0.917	0.87	2.536	0.845	1.493	0.41	0.917	1.45	0.87	0.87	1.196	2.218	0.649	1.89	1.493	0.87	1.698	1.025	2.111	0.58	0.917	0.739	0.917	1.388	1.493
14d PLX3397 600 ppm + 35d recovery	1.046	0.739	1.104	0.58	0.845	0.779	0.82	1.196	1.247	0.845	0.58	1.375	1.025	0.739	0.459	0.739	1.313	0.82	1.16	1.45	1.025	0.41	0.87	0.739	1.025	1.857	0.845	0.917	1.313	1.104	0.917	1.313	1.313	0.845	1.025	0.615	0.459	0.615	0.87	2.208	1.23	0.649	1.247	1.046	0.845	1.046	1.025	0.845	0.459
14d PLX3397 600 ppm + 35d recovery	2.272	1.16	0.649	0.87	0.649	1.16	0.739	0.87	1.025	1.025	1.046	1.752	1.16	1.297	1.104	0.917	1.313	1.025	0.649	1.247	0.41	0.917	1.934	1.479	1.45	1.025	1.104	0.82	0.917	0.87	0.845	1.025	1.16	0.58	1.375	1.375	1.046	2.697	1.601	1.247	0.87	0.649	0.58	0.82	0.739	1.313	2.32	1.025	0.845
14d PLX3397 600 ppm + 35d recovery	0.917	0.917	1.435	0.845	1.752	1.025	0.82	1.691	0.58	0.58	0.917	1.196	0.87	1.375	1.025	0.845	1.025	1.104	0.87	0.917	1.479	2.111	0.917	2.46	0.87	1.247	0.615	1.764	0.739	1.025	1.025	0.58	1.025	1.16	1.493	1.479	0.87	1.23	0.87	0.615	0.917	1.025	0.87	1.046	1.561	1.025	0.845	1.025	1.025
[truncated: 1 more columns]

## Sheet: Figure 9N
Source data for Figure 9N
Animal/sample	Treatment group	% Area of WFA/FOV
Con1	Control	1.798
Con2	Control	3.0803
Con3	Control	3.199
Con4	Control	4.518
0d1	14d PLX3397 600 ppm	10.285
0d2	14d PLX3397 600 ppm	8.643
0d3	14d PLX3397 600 ppm	6.599
0d4	14d PLX3397 600 ppm	6.07
0d5	14d PLX3397 600 ppm	5.804
28d1	14d PLX3397 600 ppm + 28d recovery	2.938
28d2	14d PLX3397 600 ppm + 28d recovery	2.746
28d3	14d PLX3397 600 ppm + 28d recovery	2.333
28d4	14d PLX3397 600 ppm + 28d recovery	0.971
28d5	14d PLX3397 600 ppm + 28d recovery	3.589
28d6	14d PLX3397 600 ppm + 28d recovery	2.039

## Sheet: Figure Supplement 7D
Source data for Figure supplement 7D
Animal/sample	Treatment group	No. of Olig2+ spots/FOV (in WM)	No. of Olig2+ spots/FOV (in CTX)	No. of Olig2+ spots/FOV (in THAL)
Con1	Control	329	194	424
Con2	Control	349	275	428
Con3	Control	315	192	363
Con4	Control	229	216	455
28d1	14d PLX3397 600 ppm + 28d recovery	375	237	435
28d2	14d PLX3397 600 ppm + 28d recovery	277	118	371
28d3	14d PLX3397 600 ppm + 28d recovery	349	290	519
28d4	14d PLX3397 600 ppm + 28d recovery	160	213	374
28d5	14d PLX3397 600 ppm + 28d recovery	325	125	361

## Sheet: Figure Supplement 7E
Source data for Figure supplement 7E
Animal/sample	Treatment group	No. of Pdgfra+ spots/FOV (in WM)	No. of Pdgfra+ spots/FOV (in CTX)	No. of Pdgfra+ spots/FOV (in THAL)
Con1	Control	579	589	388
Con2	Control	541	626	402
Con3	Control	576	534	370
Con4	Control	461	589	369
28d1	14d PLX3397 600 ppm + 28d recovery	475	647	425
28d2	14d PLX3397 600 ppm + 28d recovery	572	762	296
28d3	14d PLX3397 600 ppm + 28d recovery	531	609	411
28d4	14d PLX3397 600 ppm + 28d recovery	514	609	272

## Sheet: Figure Supplement 7F-G
Source data for Figure supplement 7F-G
Animal/sample	Treatment group	MBP % area (in hippocampus)	MBP % area (in cortex)
Con1	Control	4.78	62.256
Con2	Control	25.378	57.718
Con3	Control	28.742	34.13
Con4	Control	14.946	8.821
Con5	Control	9.863	57.411
Con6	Control	29.393
28d1	14d PLX3397 600 ppm + 28d recovery	19.122	39.373
28d2	14d PLX3397 600 ppm + 28d recovery	16.421	12.701
28d3	14d PLX3397 600 ppm + 28d recovery	14.319	48.375
28d4	14d PLX3397 600 ppm + 28d recovery	4.783	14.353
28d5	14d PLX3397 600 ppm + 28d recovery	8.472	16.446
28d6	14d PLX3397 600 ppm + 28d recovery	8.261	18.988

[truncated: 1 more sheets: Sheet4]
