# Supplementary material for: Subventricular zone/white matter microglia reconstitute the empty adult microglial niche in a dynamic wave
Source: eLife. 2021 Aug 23;10:e66738. doi: 10.7554/eLife.66738 (PMC8425950; doi:10.7554/eLife.66738)
Supplement: Figure 10—source data 1. [file elife-66738-fig10-data1.xlsx]

## Sheet: Figure 10C-G
Source data for Figure 10C-G
Animal/sample	Treatment group	No. of IBA1+ cells/FOV	Avg. cell body area (µm2)	Total # of IBA1+ processes/FOV	Avg. IBA1+ process length (µm)
Con1	Control	275	111.7	212	17.8954
Con2	Control	189	99.96	120	21.4309
Con3	Control	273	102.14	210	16.5449
Con4	Control	197	97.12	118	14.8306
90d1	14d PLX3397 600 ppm + 3m recovery	198	108.46	152	11.872
90d2	14d PLX3397 600 ppm + 3m recovery	116	120.35	70	12.9233
90d3	14d PLX3397 600 ppm + 3m recovery	211	122.7	95	14.7678
90d4	14d PLX3397 600 ppm + 3m recovery	116	113.99	94	13.5879
90d5	14d PLX3397 600 ppm + 3m recovery	164	115.23	117	15.432
90d6	14d PLX3397 600 ppm + 3m recovery	185	112.8	94	14.3846
					13.7521

## Sheet: Figure 10J
Source data for Figure 10J
Animal/sample	Treatment group	Clec7a (FPKM)	Csf1 (FPKM)	Mef2a (FPKM)	P2ry12 (FPKM)	Siglech (FPKM)	Gpr34 (FPKM)
Con1	Control	0.525983	2.99216	17.7616	11.5868	6.06719	10.7873
Con2	Control	0.698787	2.90429	17.757	17.5	7.94194	16.4072
Con3	Control	0.492032	3.95765	19.0815	14.5741	5.75385	9.79055
90d1	14d PLX3397 600 ppm + 3m recovery	0.80478	5.08584	26.7227	9.97542	4.23945	4.38856
90d2	14d PLX3397 600 ppm + 3m recovery	0.937341	4.08842	22.6485	9.63899	4.37351	4.79572
90d3	14d PLX3397 600 ppm + 3m recovery	0.92297	4.91489	24.4267	8.57234	3.22906	5.42834
90d4	14d PLX3397 600 ppm + 3m recovery	1.27204	5.50436	24.2858	10.0412	4.30346	5.59551
