# Supplementary material for: Subventricular zone/white matter microglia reconstitute the empty adult microglial niche in a dynamic wave
Source: eLife journal article supplement (doi:10.7554/elife.66738), 2021-08-23

# Symmetrical distribution and expansion of the WM Repopulation Wave

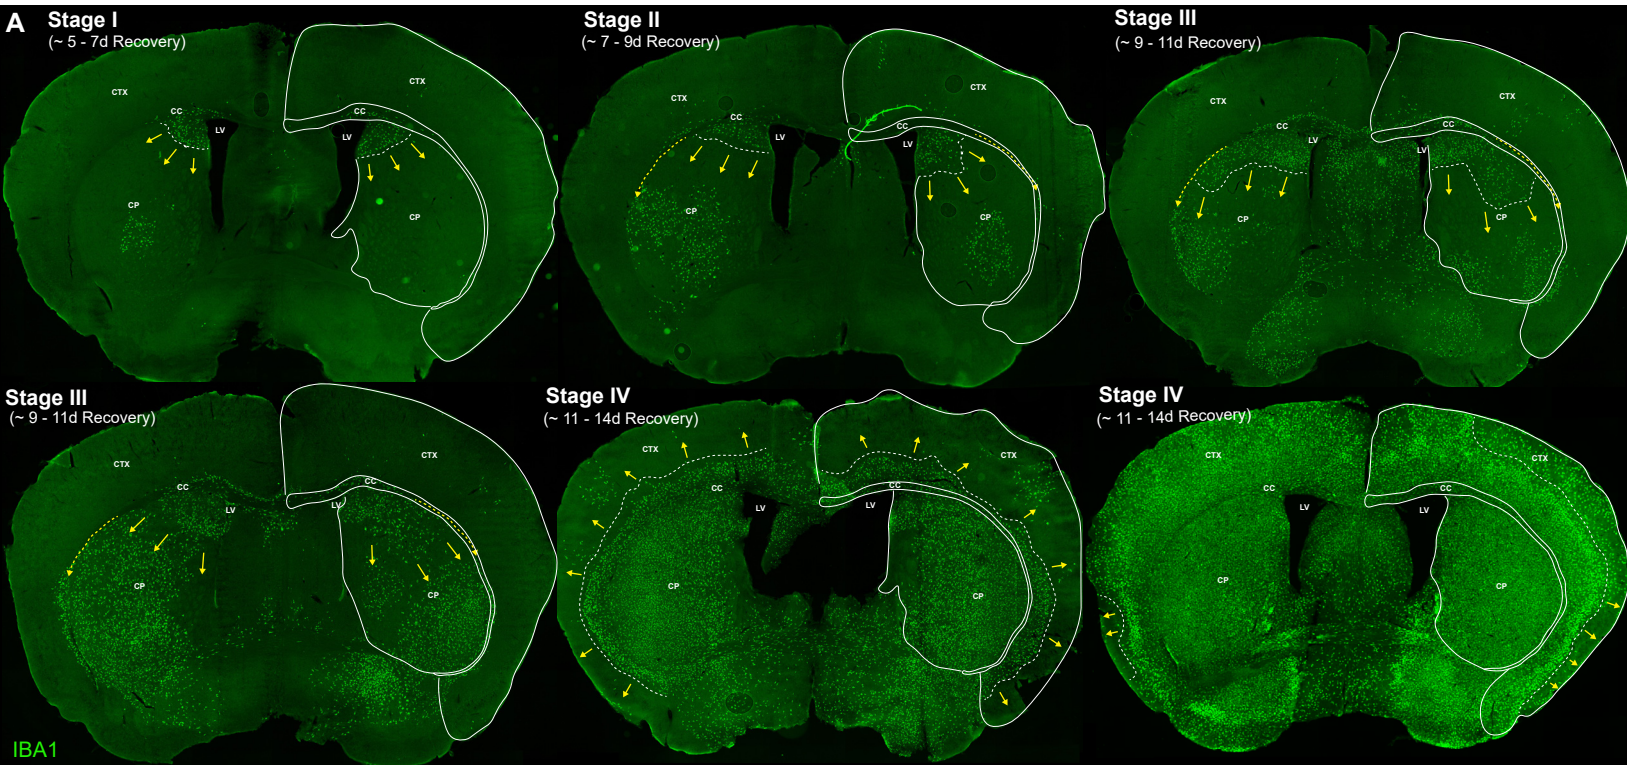

## Migration of WM repopulating cells from SVZ/WM areas into the cortical regions

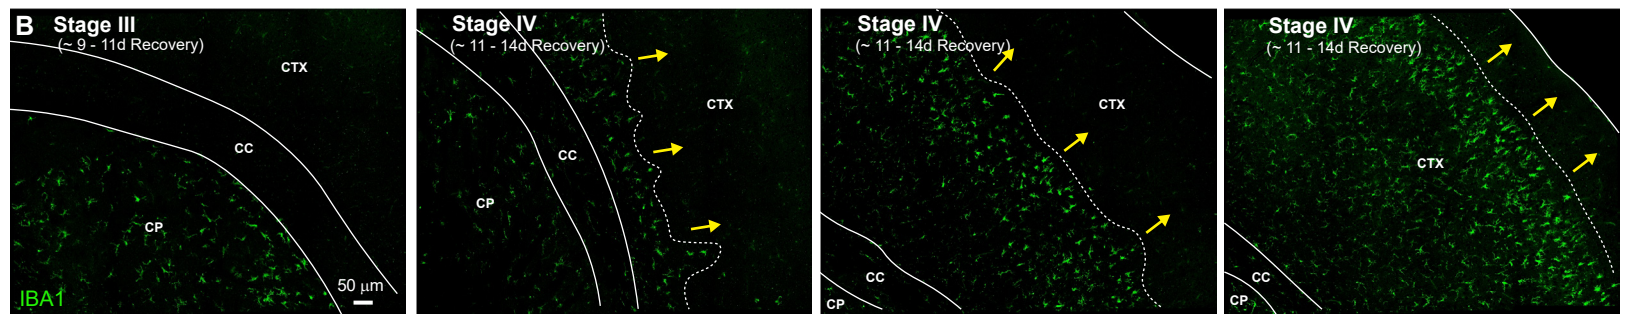

Supplement: supp [file elife-66738-supp-v1.zip]
