# Supplementary material for: Subventricular zone/white matter microglia reconstitute the empty adult microglial niche in a dynamic wave
Source: eLife journal article supplement (doi:10.7554/elife.66738), 2021-08-23

# Lineage tracing of WM repopulating myeloid cells

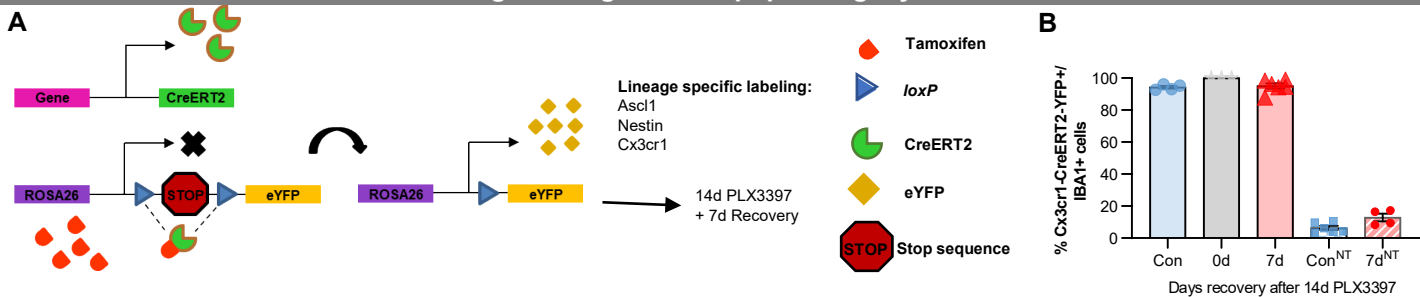

## Leakiness of Cx3cr1-CreERT2 reporter

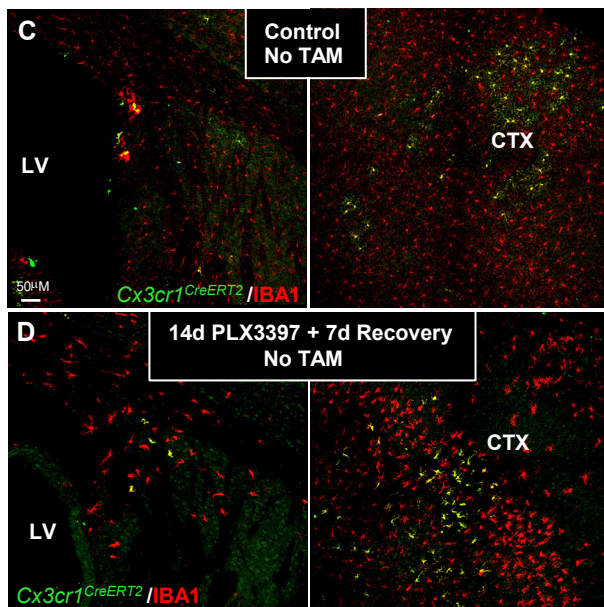

## SVZ/WM surviving cells are Cx3cr1+

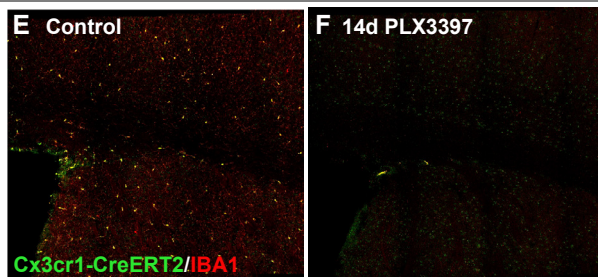

## "Wave" of WM Cx3cr1<sup>+</sup> repopulating myeloid cells

### G 14d PLX3397 + 14d Recovery

Early cortical wavefront

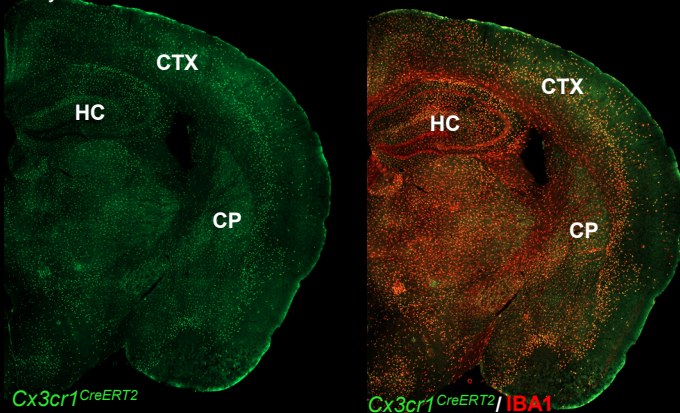

Late cortical wavefront

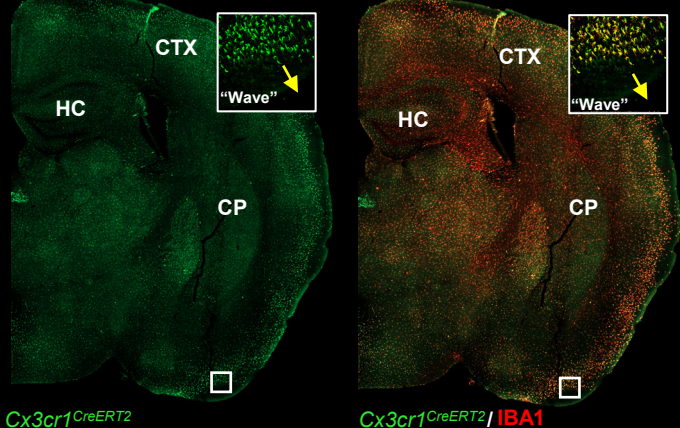

Supplement: supp [file elife-66738-supp-v1.zip]
