# Supplementary material for: Subventricular zone/white matter microglia reconstitute the empty adult microglial niche in a dynamic wave
Source: eLife journal article supplement (doi:10.7554/elife.66738), 2021-08-23
Supplement: supp [file elife-66738-supp-v1.zip]

# Transient expression of precursor cell markers in repopulating cells in the SVZ

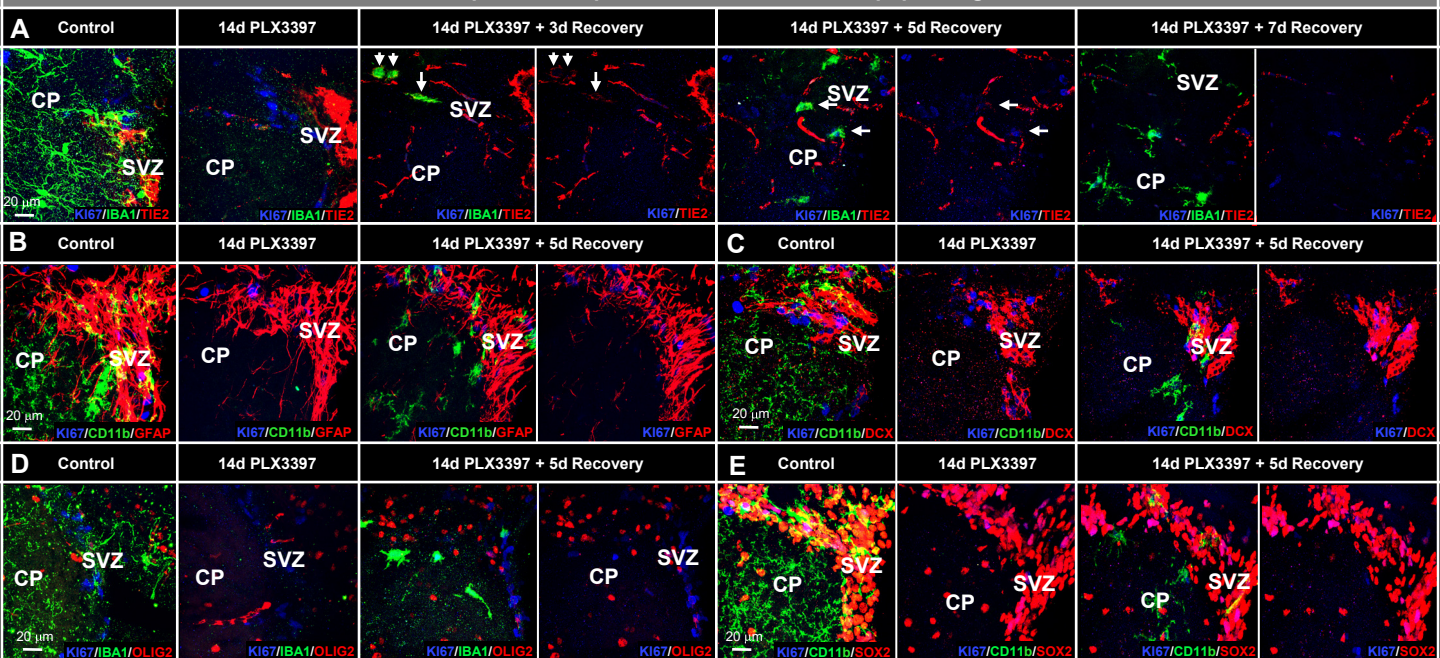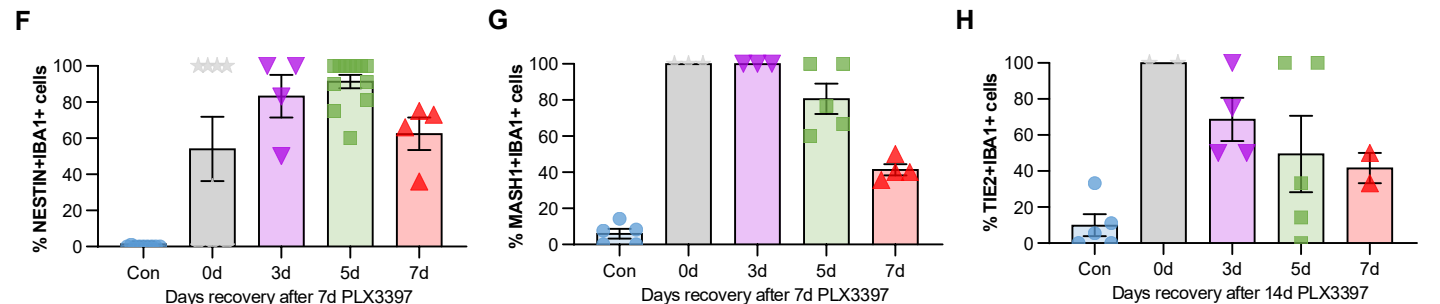

Figure 5-figure supplement 1
