# Supplementary material for: Subventricular zone/white matter microglia reconstitute the empty adult microglial niche in a dynamic wave
Source: eLife journal article supplement (doi:10.7554/elife.66738), 2021-08-23

Figure 1 displays fluorescence microscopy images of CD11b (red) and TMEM119 (green) in the cortex and white matter (WM) of mice. The images are arranged in a grid. The top row shows the control group, the middle row shows 7d recovery, the bottom row shows 14d recovery, and the far right column shows 28d recovery. The left column shows the cortex, and the right column shows the white matter. The control group shows low levels of both markers. The 7d recovery group shows increased CD11b and TMEM119 expression in the white matter. The 14d recovery group shows increased CD11b and TMEM119 expression in the cortex. The 28d recovery group shows increased CD11b and TMEM119 expression in both the cortex and white matter. A scale bar of 50  $\mu$ m is shown in the bottom left panel.

**F Control**

CTX

WM

CP

IBA1

70  $\mu$ m

**G 3.5mo Recovery**

CTX

WM

CP

**H**

● Control

■ 3.5 mo PLX3397 (600 ppm)

# of IBA1+ spots/whole brain

8000

6000

4000

2000

0

\*\*\*

**I** Control 7d Recovery + 7d PLX3397 14d PLX3397 7d Recovery 7d PLX3397

14d PLX3397 14d PLX3397

7d Recovery 14d PLX3397 7d Recovery 14d Recovery + 7d PLX3397 14d PLX3397 14d Recovery 7d PLX3397

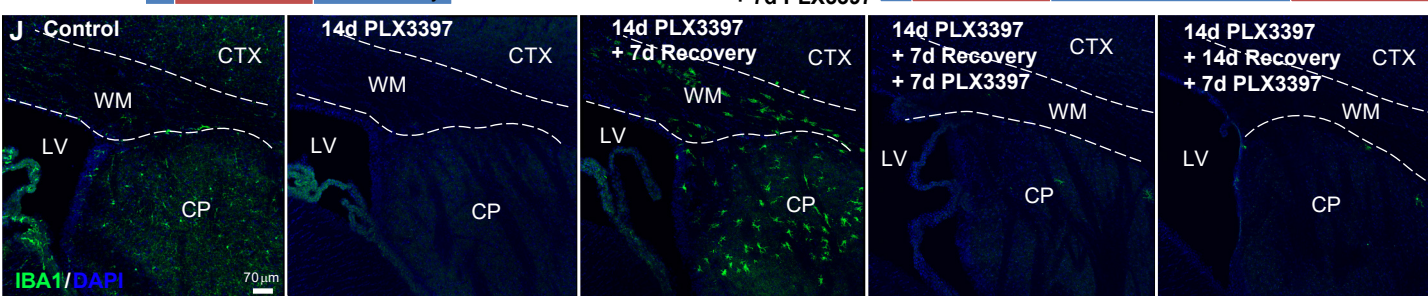

Supplement: supp [file elife-66738-supp-v1.zip]
