# Supplementary figures and images for: Subventricular zone/white matter microglia reconstitute the empty adult microglial niche in a dynamic wave
Source: eLife journal article supplement (doi:10.7554/elife.66738), 2021-08-23

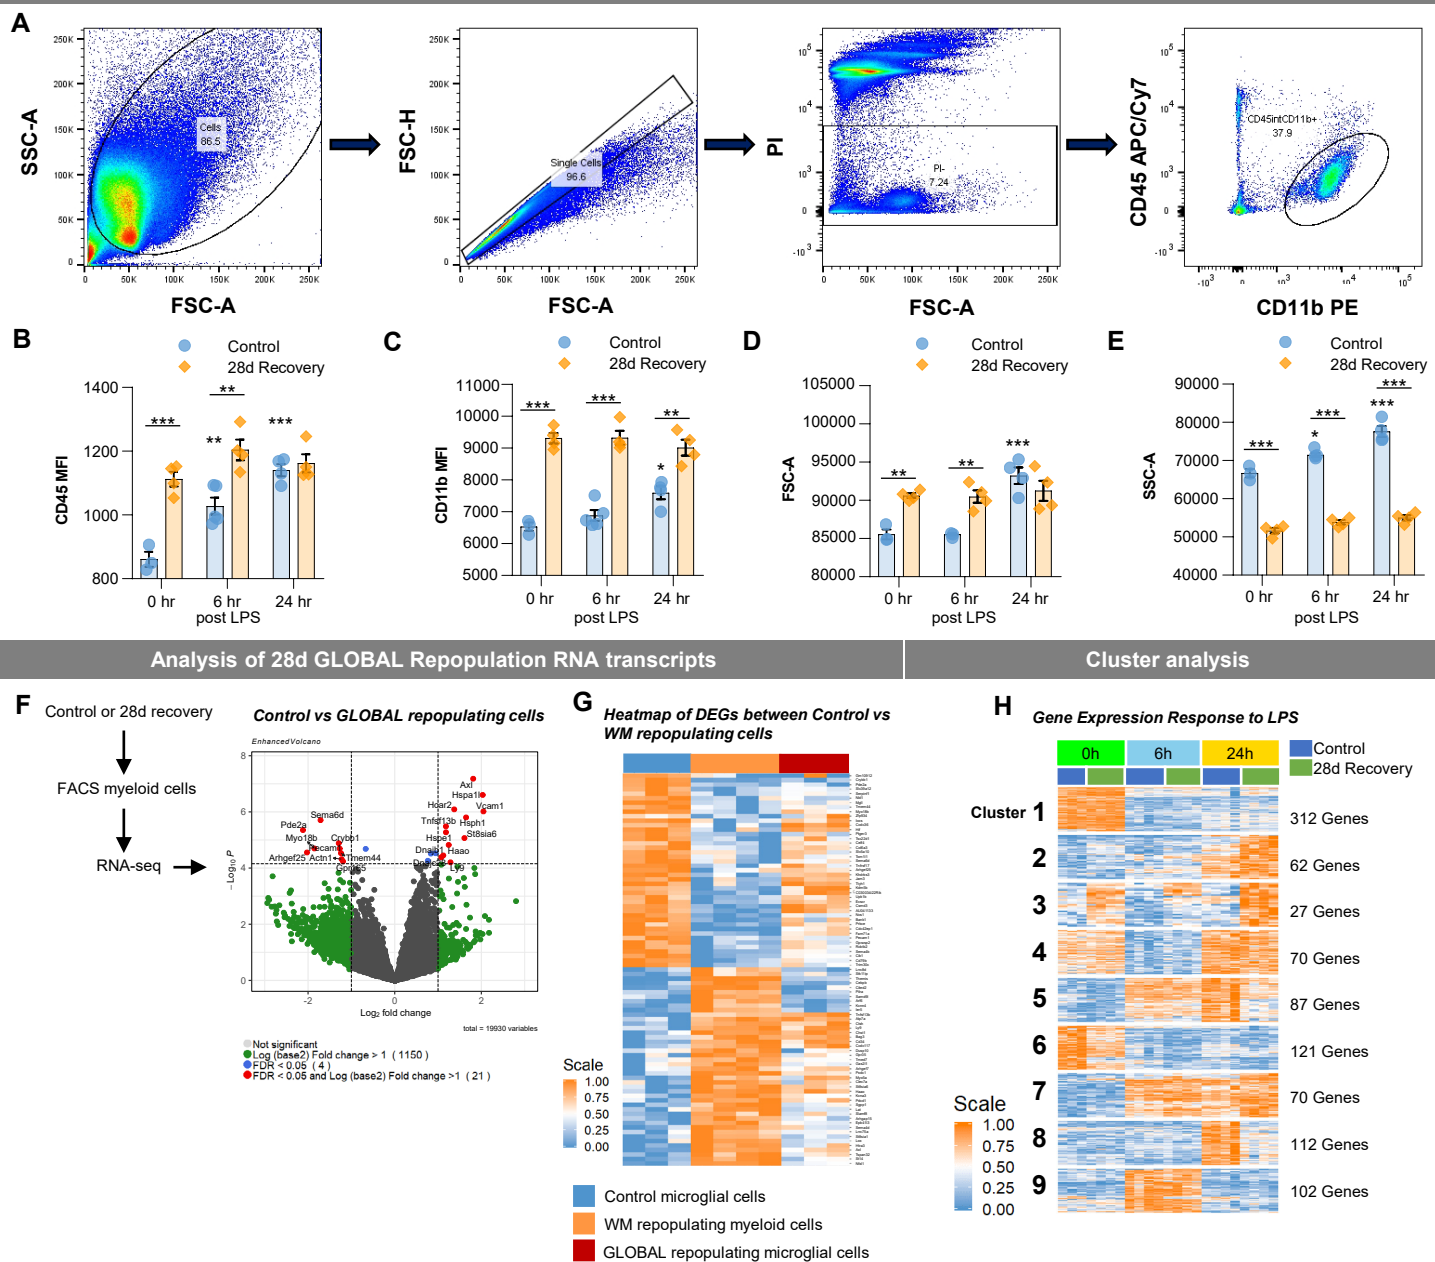

Figure 8-figure supplement 1

Supplement: supp [file elife-66738-supp-v1.zip]

# Oligodendrocytes, OPCs, and myelin in 28d Recovery mice

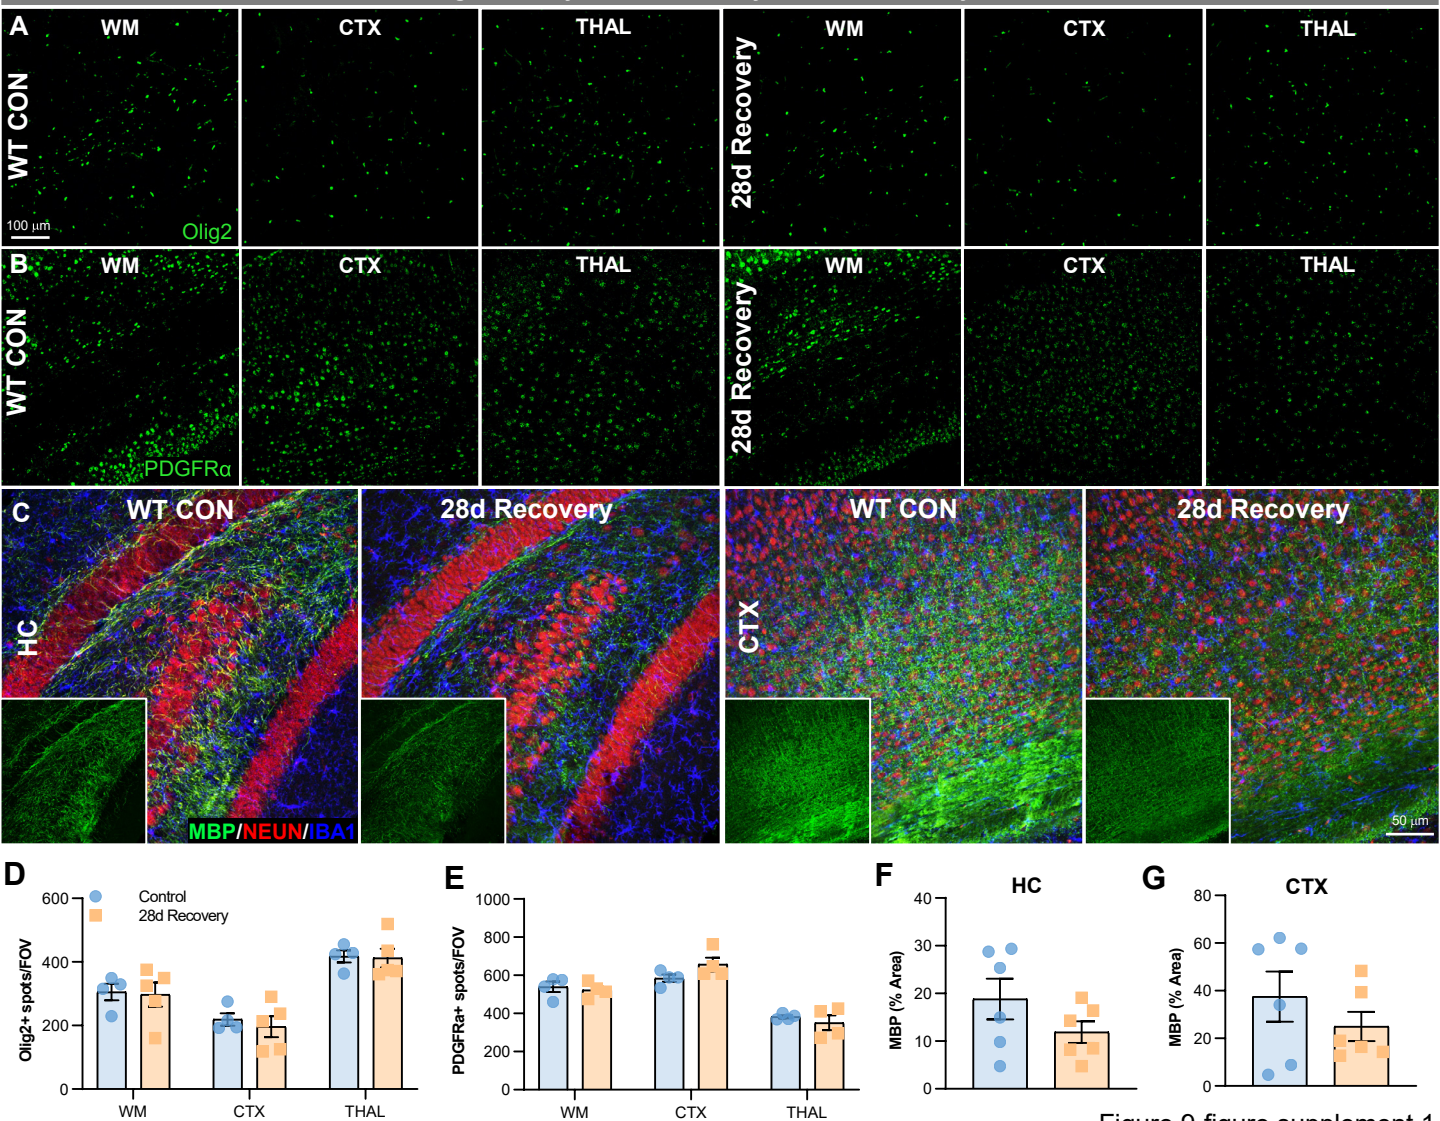

Supplement: supp [file elife-66738-supp-v1.zip]

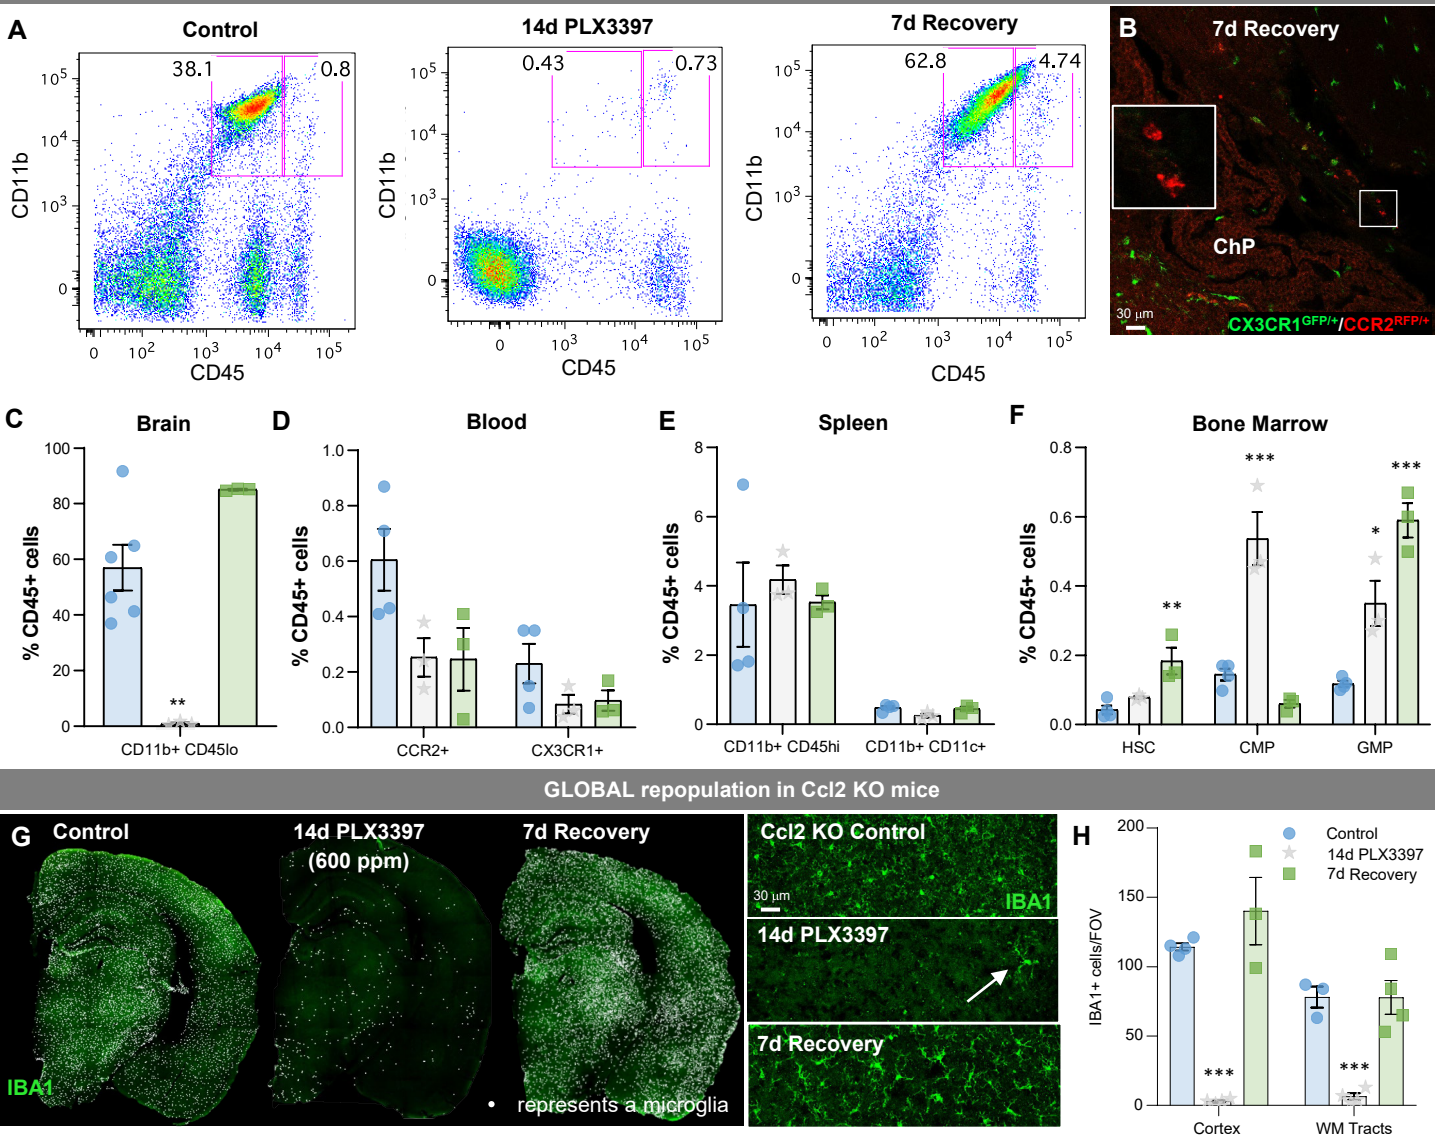

Figure 7-figure supplement 1

Supplement: supp [file elife-66738-supp-v1.zip]
